# Supplementary material for: Noise Propagation in Gene Regulation Networks Involving Interlinked Positive and Negative Feedback Loops
Source: PubMed Central journal article supplement (PMC3527455; doi:10.1371/journal.pone.0051840), 2012-12-20
Supplement: pone.0051840.s002.pdf [file pone.0051840.s002.pdf]

# Noise propagation in gene regulation networks involving interlinked positive and negative feedback loops

(*Supplementary Text S2*)

Hui Zhang, Yueling Chen, Yong Chen\*

\* E-mail: ychen@lzu.edu.cn

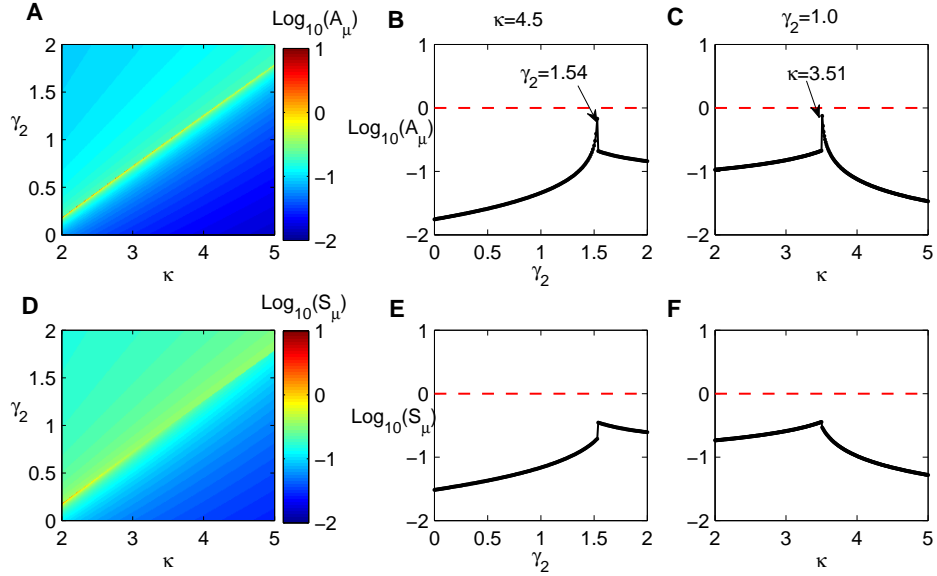

**Figure 1. Effect of the positive feedback  $\kappa$  and miRNA inhibition  $\gamma_2$  on the miRNA in the case of the initial steady on-state.** (A) The noise amplification  $A_\mu$  and (D) the sensitivity  $S_\mu$  of miRNAs as a function of  $\kappa$  and  $\gamma_2$  when the initial stable steady-state of the system is on-state in the bistable region.  $A_\mu$  and  $S_\mu$  for  $\kappa = 4.5$  (B, E) and  $\gamma_2 = 1.0$  (C, F), respectively.  $A_\mu$  and  $S_\mu$  reach the maximal values at  $\gamma_2 = 1.54$  (B, E) and  $\kappa = 3.51$  (C, F), respectively. Note that  $A_\mu$  is always less than 1. Parameters are  $\alpha = 0.15$ ,  $\gamma_1 = 1.0$ ,  $\varepsilon = 0.05$ ,  $\tau_0 = 0.5$ .

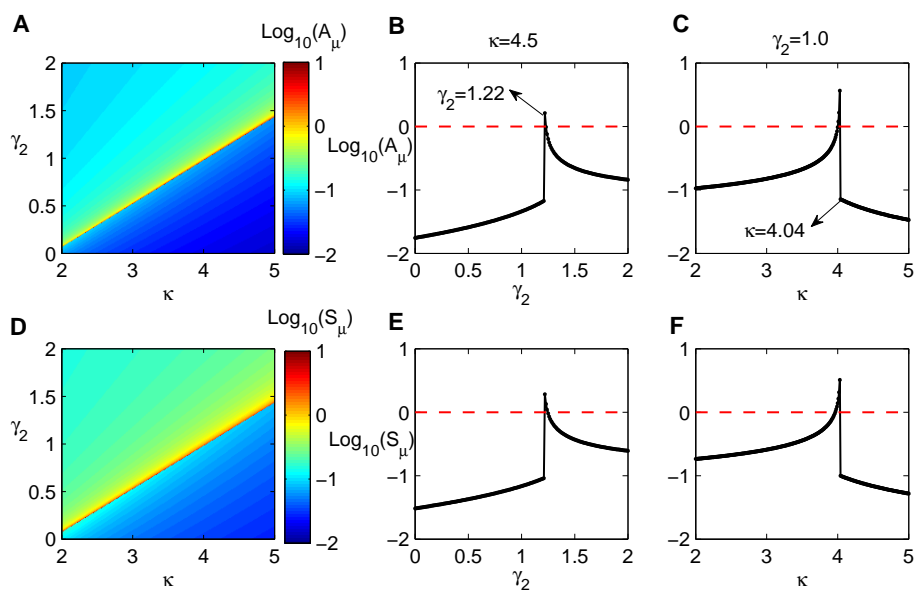

**Figure 2. Effect of the positive feedback  $\kappa$  and miRNA inhibition  $\gamma_2$  on the miRNA in the case of the initial steady off-state.** (A) The noise amplification  $A_\mu$  and (D) the sensitivity  $S_\mu$  of the miRNAs as a function of  $\kappa$  and  $\gamma_2$  for the initial steady off-state in the bistable region.  $A_\mu$  and  $S_\mu$  for  $\kappa = 4.5$  (B, E) and  $\gamma_2 = 1.0$  (C, F). Here,  $A_\mu$  and  $S_\mu$  reach their maximal values, for  $\gamma_2 = 1.22$  (B, E) and  $\kappa = 4.04$  (C, F). Note that  $A_\mu > 1$  only in the vicinity of the boundary saddle nodes. Parameters are  $\alpha = 0.15$ ,  $\gamma_1 = 1.0$ ,  $\varepsilon = 0.05$ ,  $\tau_0 = 0.5$ .
