# Supplementary material for: Noise Propagation in Gene Regulation Networks Involving Interlinked Positive and Negative Feedback Loops
Source: PubMed Central journal article supplement (PMC3527455; doi:10.1371/journal.pone.0051840), 2012-12-20
Supplement: pone.0051840.s003.pdf [file pone.0051840.s003.pdf]

# Noise propagation in gene regulation networks involving interlinked positive and negative feedback loops

## (*Supplementary Text S3*)

Hui Zhang, Yueling Chen, Yong Chen\*

\* E-mail: ychen@lzu.edu.cn

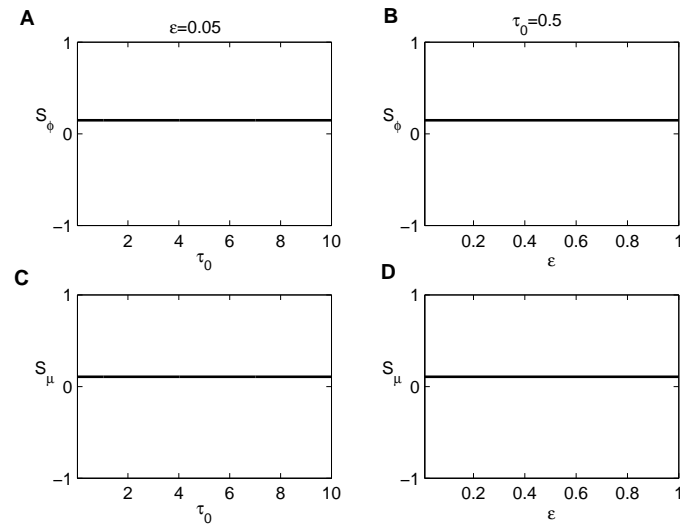

**Figure 1. The role of the noise autocorrelation time  $\tau_0$  and the time scale of the protein reaction  $\varepsilon$  on signal sensitivity.** The sensitivity of protein  $S_\phi$  and miRNA  $S_\mu$  as function of  $\tau_0$  (A, C) and  $\varepsilon$  (B, D), respectively. Parameters are  $\alpha = 0.15$ ,  $\gamma_1 = 1.0$ ,  $\gamma_2 = 1.3$ ,  $\kappa = 4.5$ .

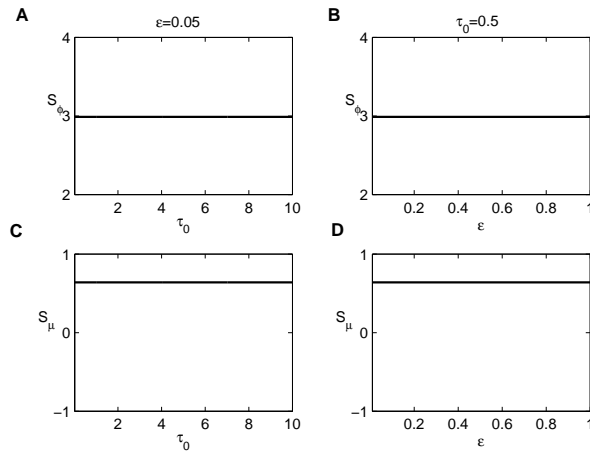

**Figure 2.** The role of the noise autocorrelation time  $\tau_0$  and the time scale of the protein reaction  $\epsilon$  on signal sensitivity with initial steady *off-state* in bistable region. The sensitivity of protein  $S_\phi$  and miRNA  $S_\mu$  as function of  $\tau_0$  (A, C) and  $\epsilon$  (B, D), respectively. Parameters are  $\alpha = 0.15$ ,  $\gamma_1 = 1.0$ ,  $\gamma_2 = 1.3$ ,  $\kappa = 4.5$ .

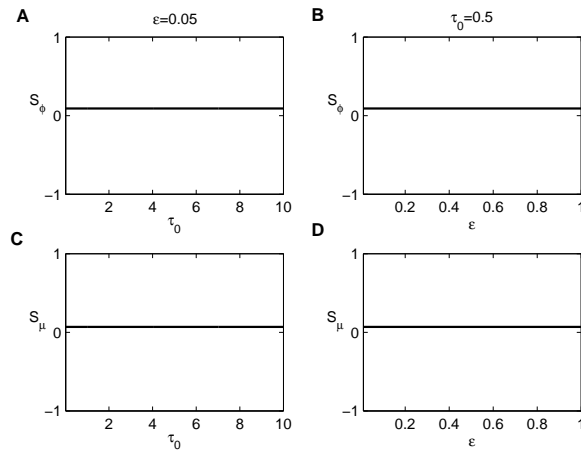

**Figure 3.** The role of the noise autocorrelation time  $\tau_0$  and the time scale of the protein reaction  $\epsilon$  on signal sensitivity in monostable region with *on-state*. The sensitivity of protein  $S_\phi$  and miRNA  $S_\mu$  as function of  $\tau_0$  (A, C) and  $\epsilon$  (B, D), respectively. Parameters are  $\alpha = 0.15$ ,  $\gamma_1 = 1.0$ ,  $\gamma_2 = 1.0$ ,  $\kappa = 4.5$ .

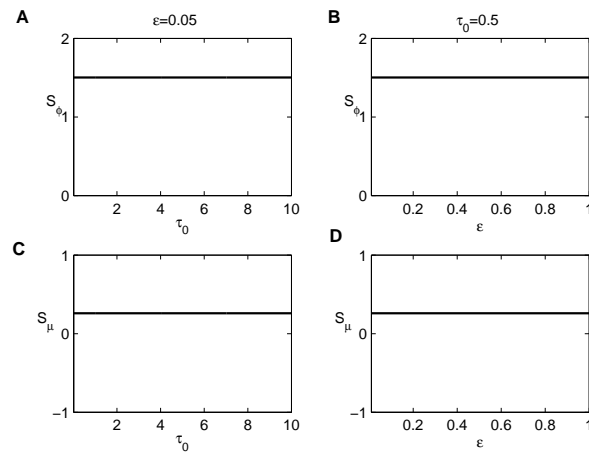

**Figure 4. The role of the noise autocorrelation time  $\tau_0$  and the time scale of the protein reaction  $\varepsilon$  on signal sensitivity in monostable region with *off-state*.** The sensitivity of protein  $S_\phi$  and miRNA  $S_\mu$  as function of  $\tau_0$  (A, C) and  $\varepsilon$  (B, D), respectively. Parameters are  $\alpha = 0.15$ ,  $\gamma_1 = 1.0$ ,  $\gamma_2 = 1.9$ ,  $\kappa = 4.5$ .

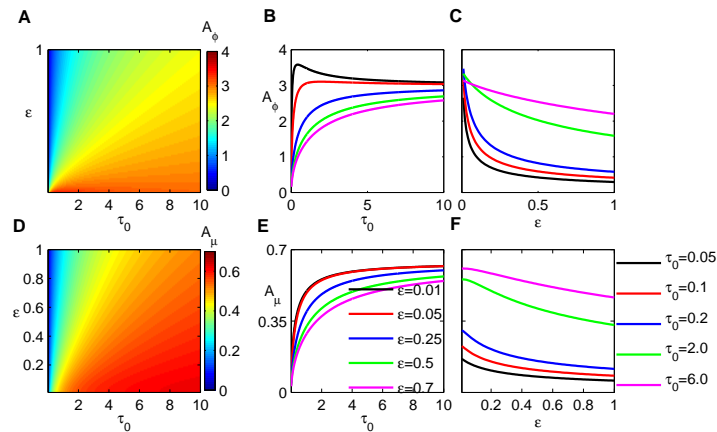

**Figure 5. The role of the noise autocorrelation time  $\tau_0$  and the time scale of the protein reaction  $\varepsilon$  on noise amplification with initial steady *off-state* in bistable region.** (A, D) The noise amplification in the protein module and miRNAs as a function of  $\varepsilon$  and  $\tau_0$ . The noise amplification evolves with  $\tau_0$  for different  $\varepsilon$  (B, E), and with  $\varepsilon$  for different  $\tau_0$  (C, F), respectively. Parameters are  $\alpha = 0.15$ ,  $\gamma_1 = 1.0$ ,  $\gamma_2 = 1.3$ ,  $\kappa = 4.5$ .

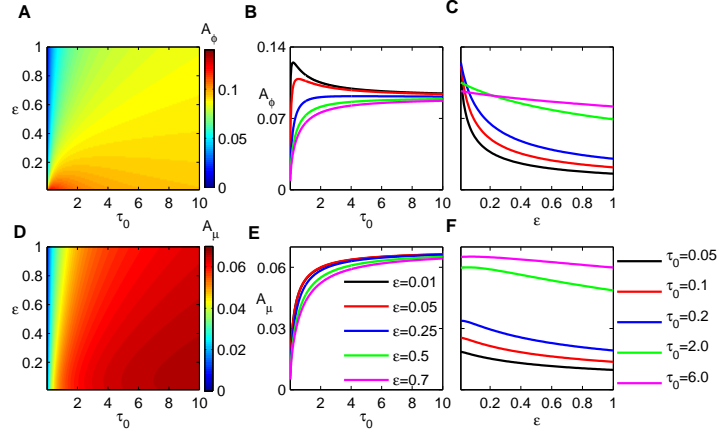

**Figure 6. The role of the noise autocorrelation time  $\tau_0$  and the time scale of the protein reaction  $\epsilon$  on noise amplification in monostable region with *on-state*.** (A, D) The noise amplification in the protein module and miRNAs as a function of  $\epsilon$  and  $\tau_0$ . The noise amplification evolves with  $\tau_0$  in input signal for different  $\epsilon$  (B, E), and  $\epsilon$  for different  $\tau_0$  (C, F), respectively. Parameters are  $\alpha = 0.15$ ,  $\gamma_1 = 1.0$ ,  $\gamma_2 = 1.0$ ,  $\kappa = 4.5$ .

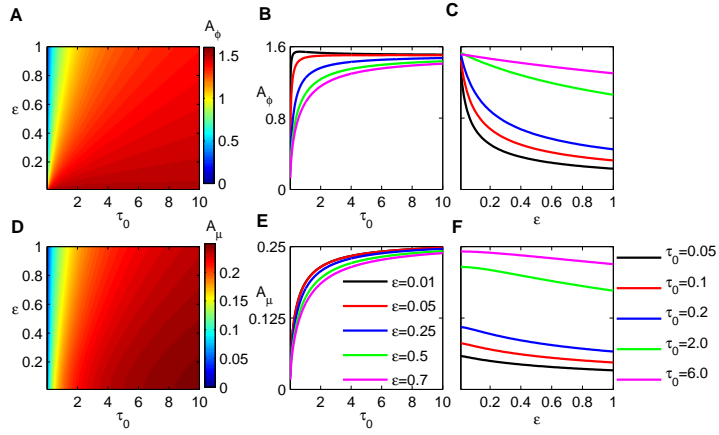

**Figure 7. The role of the noise autocorrelation time  $\tau_0$  and the time scale of the protein reaction  $\epsilon$  on noise amplification in monostable region with *off-state*.** (A, D) The noise amplification in the protein module and miRNAs as a function of  $\epsilon$  and  $\tau_0$ . The noise amplification evolves with  $\tau_0$  for different  $\epsilon$  (B, E), and  $\epsilon$  for different  $\tau_0$  (C, F), respectively. Parameters are  $\alpha = 0.15$ ,  $\gamma_1 = 1.0$ ,  $\gamma_2 = 1.9$ ,  $\kappa = 4.5$ .
